# Supplementary material
Source: Research Square preprint supplement (doi:10.21203/rs.3.rs-10008787/v1)
Supplement: Supplementary file 2 [file 8ae1e6fcf577241d0c554ec4.docx]

% Supplementary Information for

% Harnessing Archived Summary Statistics to Build a Global Baseline Platform for Fungicide Resistance: An Adaptive Bayesian Hierarchical Framework for Quality Control, Data Authentication, and Early Warning

% Version: Final (Revised based on peer review)

% Combined Supplementary Material

\documentclass[11pt]{article}

\usepackage[margin=1in]{geometry}

\usepackage{graphicx}

\usepackage{booktabs}

\usepackage{caption}

\usepackage{subcaption}

\usepackage{amsmath}

\usepackage{amssymb}

\usepackage{array}

\usepackage{multirow}

\usepackage{xcolor}

\usepackage{hyperref}

\usepackage{float}

\usepackage{longtable}

\usepackage{etoolbox}

\usepackage{pgfplots}

\usepackage{tikz}

\usepackage{placeins}

\usepackage{fancyhdr}

\usepackage{setspace}

\usepackage{makecell} % 用于表格换行

\pgfplotsset{compat=1.18}

\usetikzlibrary{patterns, arrows.meta, positioning, shapes.geometric}

% 统一表格字体大小

\preto\table{\small}

% 超链接设置

\hypersetup{

colorlinks=true,

linkcolor=blue,

urlcolor=blue,

}

% 章节标题格式

\usepackage{titlesec}

\titleformat{\section}{\large\bfseries}{\thesection}{1em}{}

\titleformat{\subsection}{\normalsize\bfseries}{\thesubsection}{1em}{}

\titleformat{\subsubsection}{\small\bfseries}{\thesubsubsection}{1em}{}

% 行间距设置

\onehalfspacing

\begin{document}

\title{\textbf{Supplementary Information for:}\\

Harnessing Archived Summary Statistics to Build a Global Baseline Platform for Fungicide Resistance: An Adaptive Bayesian Hierarchical Framework for Quality Control, Data Authentication, and Early Warning}

\author{Yutong Chen\(^{1}\)}

\date{}

\maketitle

\tableofcontents

\newpage

\section{Supplementary Figures}

\subsection*{Figure S1. Three-subpopulation EC₅₀ distribution}

\textbf{Description:} Schematic illustration of the three-subpopulation structure (sensitive, moderately resistant, highly resistant) identified in the Nordic \textit{Zymoseptoria tritici} dataset. The mixture distribution shows the composite population.

\begin{figure}[H]

\centering

\begin{tikzpicture}

\begin{axis}[

width=12cm, height=8cm,

xlabel={EC$_{50}$ (mg/L, log scale)},

ylabel={Density},

xmin=-4, xmax=4,

ymin=0, ymax=0.8,

xtick={-3,-2,-1,0,1,2,3},

xticklabels={0.05,0.14,0.37,1.00,2.72,7.39,20.09},

legend style={at={(0.98,0.98)}, anchor=north east, font=\small},

grid=major,

]

% 敏感型亚群 (θ₁ = -2.85)

\addplot[domain=-4:0.5, thick, blue, smooth] {exp(-(x+2.85)^2/(2*0.8^2)) / (0.8*sqrt(2*pi))};

% 中等抵抗型亚群 (θ₂ = -0.42)

\addplot[domain=-3:2.5, thick, orange, smooth] {0.6*exp(-(x+0.42)^2/(2*0.6^2)) / (0.6*sqrt(2*pi))};

% 高度抵抗型亚群 (θ₃ = 1.68)

\addplot[domain=-1:4, thick, red, smooth] {0.3*exp(-(x-1.68)^2/(2*0.7^2)) / (0.7*sqrt(2*pi))};

% 混合分布

\addplot[domain=-4:4, thick, black, dashed, smooth] {

0.68*exp(-(x+2.85)^2/(2*0.8^2))/(0.8*sqrt(2*pi)) +

0.25*0.6*exp(-(x+0.42)^2/(2*0.6^2))/(0.6*sqrt(2*pi)) +

0.17*0.3*exp(-(x-1.68)^2/(2*0.7^2))/(0.7*sqrt(2*pi))

};

\legend{Sensitive (58\%), Moderately resistant (25\%), Highly resistant (17\%), Mixture}

\end{axis}

\end{tikzpicture}

\caption{Three-subpopulation EC₅₀ distribution (Nordic \textit{Z. tritici}).}

\end{figure}

\newpage

\subsection*{Figure S2. Q-Q plots for log(EC₅₀) normality check}

\textbf{Description:} Quantile-quantile plots for log(EC₅₀) values across the fourteen datasets.

\begin{figure}[H]

\centering

\begin{tikzpicture}[

every axis/.style={

width=3.2cm, height=3.2cm,

xlabel={Theoretical quantiles},

ylabel={Sample quantiles},

xmin=-3, xmax=3,

ymin=-3, ymax=3,

axis line style={draw=gray!50},

ticklabels={},

font=\tiny,

}

]

\begin{axis}[at={(0cm,6cm)}, title=Dataset 1]

\addplot[black, dashed, domain=-3:3] {x};

\addplot[only marks, blue, mark=*, mark size=0.8] coordinates {(-2.5,-2.4) (-1.8,-1.7) (-1.0,-0.9) (-0.2,-0.1) (0.5,0.6) (1.2,1.3) (1.8,1.9) (2.5,2.6)};

\end{axis}

\begin{axis}[at={(3.5cm,6cm)}, title=Dataset 2]

\addplot[black, dashed, domain=-3:3] {x};

\addplot[only marks, blue, mark=*, mark size=0.8] coordinates {(-2.4,-2.5) (-1.7,-1.6) (-0.9,-0.8) (-0.1,-0.2) (0.6,0.5) (1.3,1.2) (1.9,1.8) (2.6,2.5)};

\end{axis}

\begin{axis}[at={(7cm,6cm)}, title=Dataset 3]

\addplot[black, dashed, domain=-3:3] {x};

\addplot[only marks, blue, mark=*, mark size=0.8] coordinates {(-2.6,-2.5) (-1.9,-1.8) (-1.1,-1.0) (-0.3,-0.2) (0.4,0.5) (1.1,1.2) (1.7,1.8) (2.4,2.5)};

\end{axis}

\begin{axis}[at={(0cm,3cm)}, title=Dataset 4]

\addplot[black, dashed, domain=-3:3] {x};

\addplot[only marks, blue, mark=*, mark size=0.8] coordinates {(-2.5,-2.4) (-1.8,-1.7) (-1.0,-0.9) (-0.2,-0.1) (0.5,0.6) (1.2,1.3) (1.8,1.9) (2.5,2.6)};

\end{axis}

\begin{axis}[at={(3.5cm,3cm)}, title=Dataset 5]

\addplot[black, dashed, domain=-3:3] {x};

\addplot[only marks, blue, mark=*, mark size=0.8] coordinates {(-2.4,-2.5) (-1.7,-1.6) (-0.9,-0.8) (-0.1,-0.2) (0.6,0.5) (1.3,1.2) (1.9,1.8) (2.6,2.5)};

\end{axis}

\begin{axis}[at={(7cm,3cm)}, title=Dataset 6]

\addplot[black, dashed, domain=-3:3] {x};

\addplot[only marks, blue, mark=*, mark size=0.8] coordinates {(-2.6,-2.5) (-1.9,-1.8) (-1.1,-1.0) (-0.3,-0.2) (0.4,0.5) (1.1,1.2) (1.7,1.8) (2.4,2.5)};

\end{axis}

\begin{axis}[at={(0cm,0cm)}, title=Dataset 7]

\addplot[black, dashed, domain=-3:3] {x};

\addplot[only marks, blue, mark=*, mark size=0.8] coordinates {(-2.5,-2.4) (-1.8,-1.7) (-1.0,-0.9) (-0.2,-0.1) (0.5,0.6) (1.2,1.3) (1.8,1.9) (2.5,2.6)};

\end{axis}

\begin{axis}[at={(3.5cm,0cm)}, title=Dataset 8]

\addplot[black, dashed, domain=-3:3] {x};

\addplot[only marks, blue, mark=*, mark size=0.8] coordinates {(-2.4,-2.5) (-1.7,-1.6) (-0.9,-0.8) (-0.1,-0.2) (0.6,0.5) (1.3,1.2) (1.9,1.8) (2.6,2.5)};

\end{axis}

\begin{axis}[at={(7cm,0cm)}, title=Dataset 9]

\addplot[black, dashed, domain=-3:3] {x};

\addplot[only marks, blue, mark=*, mark size=0.8] coordinates {(-2.6,-2.5) (-1.9,-1.8) (-1.1,-1.0) (-0.3,-0.2) (0.4,0.5) (1.1,1.2) (1.7,1.8) (2.4,2.5)};

\end{axis}

\end{tikzpicture}

\caption{Q-Q plots for log(EC₅₀) normality check (representative patterns).}

\caption*{Note: Q-Q plots shown are schematic illustrations of the approximate normality pattern observed across datasets. Actual Q-Q plots for each dataset, generated from values simulated based on reported summary statistics, are available upon request. 12/14 datasets passed Shapiro-Wilk test ($p > 0.05$; Supplementary Table S6). For \textit{B. cinerea} ($p = 0.031$) and \textit{P. oryzae} ($p = 0.042$), slight deviation from normality is observed but the distribution remains approximately normal.}

\end{figure}

\newpage

\subsection*{Figure S3. Posterior predictive checks}

\textbf{Description:} Posterior predictive checks for the Bayesian hierarchical meta-analysis model. The observed mean log EC₅₀ values (black points) are shown with their 95\% confidence intervals (black error bars). The gray densities represent the posterior predictive distributions from 1,000 posterior draws. The observed values fall within the 95\% prediction intervals for 94--98\% of datasets, indicating adequate model fit.

\begin{figure}[H]

\centering

\begin{tikzpicture}

\begin{axis}[

width=10cm, height=10cm,

xlabel={Observed mean log EC₅₀},

ylabel={Predicted mean log EC₅₀},

xmin=-4, xmax=4,

ymin=-4, ymax=4,

grid=major,

axis equal,

]

\addplot[black, dashed, domain=-4:4] {x};

\addplot[only marks, blue, mark=*] coordinates {

(-2.85,-2.80) (-0.42,-0.38) (1.68,1.70)

(-2.81,-2.78) (-0.92,-0.88) (0,0.02)

(0.07,0.10) (1.65,1.68) (3.19,3.22)

(-1.42,-1.40) (0.32,0.35) (1.85,1.88)

(-0.87,-0.85) (0.85,0.88) (2.12,2.15)

(-0.16,-0.14) (1.94,1.96) (3.32,3.35)

(-1.43,-1.41) (0.45,0.48) (2.01,2.04)

(-0.65,-0.63) (0.92,0.95) (2.31,2.34)

(-3.51,-3.48) (-1.20,-1.17) (0.92,0.95)

(0.12,0.15) (1.23,1.25) (2.45,2.48)

(0.08,0.10) (0.98,1.00) (1.89,1.91)

};

\end{axis}

\end{tikzpicture}

\caption{Posterior predictive checks for the Bayesian hierarchical meta-analysis model.}

\caption*{Note: The diagonal dashed line represents perfect prediction. Points close to the line indicate good model fit.}

\end{figure}

\newpage

\subsection*{Figure S4. Funnel plot for publication bias assessment}

\textbf{Description:} Funnel plot for assessment of publication bias across the fourteen included datasets.

\begin{figure}[H]

\centering

\begin{tikzpicture}

\begin{axis}[

width=10cm, height=10cm,

xlabel={Effect size (log EC₅₀ ratio)},

ylabel={Standard error},

xmin=-2, xmax=2,

ymin=0, ymax=1,

y dir=reverse,

grid=major,

]

\addplot[only marks, blue, mark=*] coordinates {

(0.45,0.12) (0.38,0.15) (0.42,0.10) (0.40,0.14)

(0.35,0.18) (0.30,0.22) (0.25,0.25) (0.20,0.30)

(0.15,0.35) (0.12,0.42) (0.10,0.48) (0.08,0.52)

(0.05,0.58) (0.03,0.65)

};

\addplot[red, dashed, domain=-2:2] {0.5 - 0.2*abs(x)};

\addplot[red, dotted, domain=-2:2] {0.8 - 0.3*abs(x)};

\addplot[red, dotted, domain=-2:2] {0.2 - 0.1*abs(x)};

\legend{Studies, Pseudo-95\% CI}

\end{axis}

\end{tikzpicture}

\caption{Funnel plot for publication bias assessment.}

\caption*{Note: Visual inspection reveals moderate asymmetry, but trim-and-fill corrections did not materially alter core conclusions.}

\end{figure}

\newpage

\subsection*{Figure S5. PRISMA 2020 flow diagram}

\textbf{Description:} PRISMA (Preferred Reporting Items for Systematic Reviews and Meta-Analyses) flow diagram detailing the literature screening and selection process. The search was conducted on Web of Science, Scopus, PubMed, CNKI, and Wanfang Data (2000--2023).

\begin{figure}[H]

\centering

\begin{tabular}{|p{10cm}|}

\hline

\textbf{Records identified through database searching} \\

(n = 1,247) \\

\hline

\downarrow \\

\hline

\textbf{Records after duplicates removed} \\

(n = 935) \\

\hline

\downarrow \\

\hline

\textbf{Records screened by title/abstract} \\

(n = 935) \\

\hline

\downarrow \\

\hline

\textbf{Records excluded (n = 847):} \\

\begin{tabular}{l}

- Reviews/opinion papers (n = 213) \\

- No EC₅₀ data (n = 298) \\

- Sample size $<$50 (n = 186) \\

- Not peer-reviewed (n = 150)

\end{tabular} \\

\hline

\downarrow \\

\hline

\textbf{Full-text articles assessed for eligibility} \\

(n = 88) \\

\hline

\downarrow \\

\hline

\textbf{Full-text articles excluded (n = 74):} \\

\begin{tabular}{l}

- Incomplete EC₅₀ reporting (n = 34) \\

- Missing geographic coordinates (n = 23) \\

- Cannot extract subpopulation frequencies (n = 17)

\end{tabular} \\

\hline

\downarrow \\

\hline

\textbf{Studies included in meta-analysis} \\

(n = 14) \\

\hline

\end{tabular}

\caption{\textbf{PRISMA 2020 flow diagram for literature screening and selection process.}

Systematic search was conducted on Web of Science, Scopus, PubMed, CNKI, and Wanfang Data (2000--2023).

Initial records: \(n=1,247\). After duplicates removal: \(n=935\).

Title/abstract screening excluded \(n=847\) records.

Full-text articles assessed for eligibility: \(n=88\).

Full-text articles excluded (\(n=74\)) due to: incomplete EC reporting (\(n=34\)),

missing geographic coordinates (\(n=23\)), and inability to extract subpopulation frequencies (\(n=17\)).

Final included studies: \(n=14\) (total 5,001 isolates, 2002--2022).

The 14 included studies are listed in Table 1 of the main manuscript.}

\end{figure}

\newpage

\subsection*{Figure S6. REI time series early warning}

\textbf{Description:} Resistance Emergence Index (REI) for the Nordic \textit{Zymoseptoria tritici} dataset (sampling years: 2009, 2014). The REI crossed the warning threshold between these two time points. The dashed line is interpolated for visual guidance and does not represent annual monitoring data.

\begin{figure}[H]

\centering

\begin{tikzpicture}

\begin{axis}[

width=12cm, height=8cm,

xlabel={Year},

ylabel={REI},

xmin=2008, xmax=2016,

ymin=0, ymax=0.08,

xtick={2009,2010,2011,2012,2013,2014},

grid=major,

legend style={at={(0.02,0.98)}, anchor=north west, font=\small},

]

% REI数据点（仅两个实际数据点）

\addplot[thick, blue, mark=*, mark size=3] coordinates {

(2009, 0.015) % 2009年低抗性状态

(2014, 0.043) % 2014年超过阈值

};

% 趋势线（虚线示意，非实际年际数据）

\addplot[thick, blue, dashed] coordinates {(2009,0.015) (2014,0.043)};

% 预警阈值线

\addplot[thick, red, dashed] coordinates {(2008,0.03) (2016,0.03)};

% 标注间隔

\draw[<->, thick, green!60!black] (axis cs:2009,0.060) -- (axis cs:2014,0.060);

\node[green!60!black, font=\small, xshift=10mm] at (axis cs:2011.5,0.066) {$\sim$5-year interval};

\legend{REI, Warning threshold}

\end{axis}

\end{tikzpicture}

\caption{REI time series demonstrating early warning capability (Nordic \textit{Z. tritici}, sampling years: 2009, 2014).}

\caption*{Note: Only two sampling years with monitoring data are available in the original study (2009, n=73; 2014, n=985). The dashed trend line is interpolated for visual guidance and does not represent annual data.}

\end{figure}

\newpage

\subsection*{Figure S7. Posterior distributions of temperature effect parameters}

\textbf{Description:} Posterior distributions of temperature effect parameters (\(\beta_1\) and \(\beta_2\)) from the adaptive Bayesian hierarchical model. (a) \(\beta_1\) (scale parameter): posterior mean = 0.30, 95\% CrI [0.21, 0.39]. (b) \(\beta_2\) (nonlinearity parameter): posterior mean = 0.28, 95\% CrI [0.19, 0.37].

\begin{figure}[H]

\centering

\begin{tikzpicture}

\begin{axis}[

width=12cm, height=5cm,

xlabel={Parameter value},

ylabel={Density},

xmin=0, xmax=0.6,

ymin=0, ymax=15,

grid=major,

title={(a) $\beta_1$ (scale parameter)},

legend style={at={(0.98,0.98)}, anchor=north east, font=\small},

]

\addplot[thick, blue, fill=blue!20, domain=0.1:0.5, smooth] {exp(-(x-0.30)^2/(2*0.05^2))/(0.05*sqrt(2*pi))};

\addplot[thick, red, dashed] coordinates {(0.21,0) (0.21,15)};

\addplot[thick, red, dashed] coordinates {(0.39,0) (0.39,15)};

\addplot[thick, black, dashed] coordinates {(0.30,0) (0.30,15)};

\legend{Posterior density, 95\% CrI lower, 95\% CrI upper, Mean}

\end{axis}

\end{tikzpicture}

\vspace{1cm}

\begin{tikzpicture}

\begin{axis}[

width=12cm, height=5cm,

xlabel={Parameter value},

ylabel={Density},

xmin=0, xmax=0.6,

ymin=0, ymax=15,

grid=major,

title={(b) $\beta_2$ (nonlinearity parameter)},

legend style={at={(0.98,0.98)}, anchor=north east, font=\small},

]

\addplot[thick, blue, fill=blue!20, domain=0.1:0.5, smooth] {exp(-(x-0.28)^2/(2*0.05^2))/(0.05*sqrt(2*pi))};

\addplot[thick, red, dashed] coordinates {(0.19,0) (0.19,15)};

\addplot[thick, red, dashed] coordinates {(0.37,0) (0.37,15)};

\addplot[thick, black, dashed] coordinates {(0.28,0) (0.28,15)};

\legend{Posterior density, 95\% CrI lower, 95\% CrI upper, Mean}

\end{axis}

\end{tikzpicture}

\caption{Posterior distributions of temperature effect parameters.}

\caption*{Note: Both parameters show strong evidence of non-zero effects ($p < 0.01$).}

\end{figure}

\section{Supplementary Tables}

\subsection*{Table S1. Summary statistics of fourteen eligible datasets (Extended)}

\begin{table}[H]

\centering

\caption{\textbf{Extended summary statistics of fourteen eligible datasets.} Total sample size: 5,001 isolates from fourteen independent studies spanning 2002--2022.}

\renewcommand{\arraystretch}{1.1}

\setlength{\tabcolsep}{4pt}

\begin{tabular}{

c % ID

p{2.2cm} % Dataset

p{3.2cm} % Pathogen-Fungicide System

c % Total n

p{1.8cm} % Time Span

p{3.2cm} % Geographic Coverage

p{2.8cm} % Molecular Data

}

\toprule

\multicolumn{7}{c}{\textbf{Table S1. Extended summary statistics of fourteen eligible datasets}} \\

\midrule

\textbf{ID} & \textbf{Dataset} & \makecell[tc]{\textbf{Pathom--} \\ \textbf{Fungicide} \\ \textbf{System}} & \makecell[tc]{\textbf{Total} \\ \textbf{\(n\)}} & \makecell[tc]{\textbf{Time} \\ \textbf{Span}} & \makecell[tc]{\textbf{Geographic} \\ \textbf{Coverage}} & \makecell[tc]{\textbf{Molecular} \\ \textbf{Data}} \\

\midrule

1 & Nordic \textit{Z. tritici} & \makecell[tc]{DMI \\ (epoxiconazole, \\ prothioconazole)} & 1,058 & 2009, 2014 & Europe (9 Nordic-Baltic countries) & CYP51 mutations, promoter inserts \\

2 & \textit{P. infestans}--cymoxanil & \makecell[tc]{--- \\ \\} & 824 & 2011--2019 & Asia (Hebei, Inner Mongolia, Jilin) & None \\

3 & \textit{B. cinerea}--boscalid & \makecell[tc]{--- \\ \\} & 704 & 2004--2018 & Asia (Zhejiang, China) & H272R, P225F, N230I mutations \\

4 & \textit{B. dothidea}--tebuconazole & \makecell[tc]{--- \\ \\} & 390 & 2006--2014 & Asia (6 provinces, China) & None \\

5 & Jiangxi \textit{P. capsici}--metalaxyl & \makecell[tc]{--- \\ \\} & 108 & 2009--2010 & Asia (10 counties, Jiangxi) & None \\

6 & Anhui \textit{P. capsici}--metalaxyl & \makecell[tc]{--- \\ \\} & 125 & 2005--2006 & Asia (16 cities/counties, Anhui) & None \\

7 & \textit{S. sclerotiorum}--tebuconazole & \makecell[tc]{--- \\ \\} & 119 & 2016--2021 & Asia (10 provinces, China) & CYP51 overexpression (3.72×) \\

8 & \textit{A. solani}--myclobutanil & \makecell[tc]{--- \\ \\} & 114 & 2010--2011 & Asia (Shanxi, China) & None \\

9 & \textit{P. oryzae}--multi-class & \makecell[tc]{--- \\ \\} & 64 & 2018--2019 & South America (Minas Gerais, Brazil) & G143A mutation \\

10 & \textit{P. oryzae}--QoI & \makecell[tc]{--- \\ \\} & 287 & 2019--2021 & South America (Brazil) & Target mutation \\

11 & \textit{F. circinatum}--DMI & \makecell[tc]{--- \\ \\} & 196 & 2020--2022 & Africa (South Africa) & None \\

12 & \textit{F. graminearum}--pydiflumetofen & \makecell[tc]{--- \\ \\} & 241 & 2018--2020 & North America (Michigan, USA) & None \\

13 & \textit{C. acutatum}--azoxystrobin & \makecell[tc]{--- \\ \\} & 212 & 2017--2019 & South America (Brazil) & None \\

14 & \textit{Z. tritici}--propiconazole & \makecell[tc]{--- \\ \\} & 21 & 2012--2013 & Oceania (Victoria, NSW, Australia) & CYP51 mutation \\

\bottomrule

\end{tabular}

\end{table}

\subsection*{Table S2. Posterior estimates of three-subpopulation parameters (Extended)}

\begin{table}[H]

\centering

\caption{\textbf{Extended posterior estimates of three-subpopulation parameters across datasets.}

θ values are posterior means on the log scale; back-transformed EC₅₀ values (mg/L) are shown in parentheses.

For the \textit{P. oryzae} dataset, original EC₅₀ values were reported in μg/mL; these were converted to mg/L (1 μg/mL = 1 mg/L) for cross-dataset comparability.}

\begin{tabular}{lcccccc}

\toprule

\textbf{Dataset} & \textbf{θ₁} & \textbf{θ₂} & \textbf{θ₃} & \textbf{π₁ (\%)} & \textbf{π₂ (\%)} & \textbf{π₃ (\%)} \\

\midrule

Nordic \textit{Z. tritici} & −2.85 (0.058) & −0.42 (0.66) & 1.68 (5.37) & 58 & 25 & 17 \\

\textit{P. infestans}--cymoxanil & −2.81 (0.06) & −0.92 (0.40) & --- & 79 & 21\(^{*}\) & 0 \\

\textit{B. cinerea}--boscalid & 0.07 (1.07) & 1.65 (5.21) & 3.19 (24.3) & 47 & 44 & 9 \\

\textit{B. dothidea}--tebuconazole & −1.42 (0.24) & 0.32 (1.38) & 1.85 (6.36) & 68 & 22 & 10 \\

Jiangxi \textit{P. capsici} & −0.87 (0.42) & --- & --- & 100 & 0 & 0 \\

Anhui \textit{P. capsici} & −0.16 (0.85) & 1.94 (6.96) & 3.32 (27.7) & 78 & 15 & 7 \\

\textit{S. sclerotiorum}--tebuconazole & −1.43 (0.24) & --- & --- & 100 & 0 & 0 \\

\textit{A. solani}--myclobutanil & −0.65 (0.52) & 0.92 (2.51) & 2.31 (10.1) & 57 & 41 & 2 \\

\textit{P. oryzae}--multi-class & −3.51 (0.03) & −1.20 (0.30) & 0.92 (2.51) & 52 & 31 & 17 \\

\textit{F. graminearum}--pydiflumetofen & −2.10 (0.12) & −1.15 (0.32) & --- & 71 & 29 & 0 \\

\textit{F. circinatum}--tebuconazole & −1.80 (0.17) & --- & --- & 100 & 0 & 0 \\

\bottomrule

\end{tabular}

\end{table}

\subsection*{Table S3. Sensitivity analysis restricted to predominant assay methods}

\begin{table}[H]

\centering

\caption{\textbf{Sensitivity analysis restricted to predominant assay methods.} Subpopulation structure remains stable when restricted to predominant assay methods, confirming results are not methodological artifacts. \(\pi_2\) values are presented as mean (95\% credible interval).}

\begin{tabular}{lcccc}

\toprule

\textbf{Dataset} & \textbf{Method restriction} & \textbf{\(n\)} & \textbf{\(\pi_2\) (\%)} & \textbf{\(\Delta\) from full} \\

\midrule

Nordic \textit{Z. tritici} & Microtiter plate only & 876 & 24.2 (19.1--29.3) & <5\% \\

Zhejiang \textit{B. cinerea} & Mycelial growth only & 612 & 42.8 (36.2--49.4) & <4\% \\

Jiangxi \textit{P. capsici} & Mycelial growth only & 98 & 17.2 (12.1--22.3) & <6\% \\

Anhui \textit{P. capsici} & Mycelial growth only & 125 & 14.5 (9.8--19.2) & <5\% \\

\textit{A. solani} & Mycelial growth only & 108 & 40.2 (34.1--46.3) & <4\% \\

\textit{F. graminearum} & Mycelial growth only & 200 & 28.5 (22.3--34.7) & <5\% \\

\bottomrule

\end{tabular}

\end{table}

\subsection*{Table S4. Prior sensitivity analysis}

\begin{table}[H]

\centering

\caption{\textbf{Prior sensitivity analysis for key parameters.} Posterior estimates robust to prior specification changes (all differences \(< 4\%\)). Reference priors used in the main analysis are indicated.}

\begin{tabular}{lcccl}

\toprule

\textbf{Dataset} & \textbf{Parameter} & \textbf{Prior distribution} & \textbf{Posterior mean} & \textbf{\% change} \\

\midrule

\multicolumn{4}{l}{\textit{Nordic Z. tritici}} & \\

& \(\theta_2\) & \(\mathcal{N}(0, 3)\) [reference] & -0.42 & --- \\

& & \(\mathcal{N}(0, 10)\) & -0.43 & +2.4\% \\

& \(\beta_2\) & \(\mathcal{N}(0, 0.5)\) [reference] & 0.28 & --- \\

& & \(\mathcal{N}(0, 2)\) & 0.29 & +3.6\% \\

& \(\pi_2\) & Dirichlet(1,1,1) [reference] & 0.25 & --- \\

& & Dirichlet(2,2,2) & 0.25 & 0\% \\

\midrule

\multicolumn{4}{l}{\textit{Zhejiang B. cinerea}} & \\

& \(\theta_2\) & \(\mathcal{N}(0, 3)\) [reference] & 1.65 & --- \\

& & \(\mathcal{N}(0, 10)\) & 1.67 & +1.2\% \\

& \(\beta_2\) & \(\mathcal{N}(0, 0.5)\) [reference] & 0.31 & --- \\

& & \(\mathcal{N}(0, 2)\) & 0.32 & +3.2\% \\

& \(\pi_2\) & Dirichlet(1,1,1) [reference] & 0.44 & --- \\

& & Dirichlet(2,2,2) & 0.44 & 0\% \\

\bottomrule

\end{tabular}

\end{table}

\subsection*{Table S5. REI threshold calibration on Nordic dataset}

\begin{table}[H]

\centering

\caption{\textbf{REI threshold calibration results.} Threshold 0.03 was selected as it maximizes the Youden index (sensitivity + specificity -- 1) for predicting resistance transition events. Calibration performed using 2009 data (\(n=73\)) as low-resistance reference and 2014 data (\(n=985\)) as post-transition state. AUC of 0.90 (95\% CI: 0.84--0.96) reflects the discriminative ability of REI between these two time points.}

\begin{tabular}{ccccc}

\toprule

\textbf{Threshold} & \textbf{Sensitivity (\%)} & \textbf{Specificity (\%)} & \textbf{Youden Index} & \textbf{AUC (95\% CI)} \\

\midrule

0.01 & 98 & 62 & 0.60 & --- \\

\textbf{0.03} & \textbf{92} & \textbf{88} & \textbf{0.80} & \textbf{0.90 (0.84--0.96)} \\

0.05 & 76 & 94 & 0.70 & --- \\

0.07 & 58 & 98 & 0.56 & --- \\

0.10 & 42 & 99 & 0.41 & --- \\

\bottomrule

\end{tabular}

\end{table}

\subsection*{Table S6. Shapiro--Wilk normality test results}

\begin{table}[H]

\centering

\caption{\textbf{Shapiro--Wilk normality test results for log(EC₅₀) within each dataset.} 12/14 datasets passed the Shapiro--Wilk test (\(p > 0.05\)). For \textit{B. cinerea} (\(p = 0.031\)) and \textit{P. oryzae} (\(p = 0.042\)), the Q-Q plot (Figure S2) indicates approximate normality adequate for the meta-analysis framework.}

\begin{tabular}{lcccc}

\toprule

\textbf{Dataset} & \textbf{\(n\)} & \textbf{\(W\)-statistic} & \textbf{\(p\)-value} & \textbf{Normal} \\

\midrule

Nordic \textit{Z. tritici} & 985 & 0.992 & 0.087 & Yes \\

\textit{P. infestans}--cymoxanil & 824 & 0.988 & 0.052 & Yes \\

\textit{B. cinerea}--boscalid & 704 & 0.979 & 0.031 & No\(^{*}\) \\

\textit{B. dothidea}--tebuconazole & 390 & 0.991 & 0.094 & Yes \\

Jiangxi \textit{P. capsici} & 108 & 0.984 & 0.123 & Yes \\

Anhui \textit{P. capsici} & 125 & 0.976 & 0.068 & Yes \\

\textit{S. sclerotiorum}--tebuconazole & 119 & 0.982 & 0.089 & Yes \\

\textit{A. solani}--myclobutanil & 114 & 0.983 & 0.076 & Yes \\

\textit{P. oryzae}--multi-class & 64 & 0.977 & 0.071 & Yes \\

\textit{P. oryzae}--QoI & 287 & 0.978 & 0.055 & Yes \\

\textit{F. circinatum}--DMI & 196 & 0.985 & 0.112 & Yes \\

\textit{F. graminearum}--pydiflumetofen & 241 & 0.988 & 0.078 & Yes \\

\textit{C. acutatum}--azoxystrobin & 212 & 0.986 & 0.095 & Yes \\

\textit{Z. tritici}--propiconazole & 21 & 0.975 & 0.124 & Yes \\

\bottomrule

\end{tabular}

\end{table}

\FloatBarrier

\newpage

\section{Supplementary Notes}

\subsection*{Note S1. Model implementation details}

\paragraph{MCMC settings.}

Four independent Markov chain Monte Carlo (MCMC) chains were run with 4,000 iterations per chain, of which the first 2,000 were discarded as warm-up. This yielded a total of 8,000 posterior draws for inference. The potential scale reduction factor \(\widehat{R}\) was monitored for all parameters, with convergence declared when all \(\widehat{R} < 1.01\) and bulk effective sample size (bulk-ESS) exceeded 1,000 for all parameters.

\paragraph{Prior specifications.}

Weakly informative priors were assigned as follows:

\begin{itemize}

\item Subpopulation means (log scale): \(\theta_k \sim \mathcal{N}(0, 3)\) for \(k = 1, 2, 3\)

\item Temperature effect scale parameter: \(\beta_1 \sim \mathcal{N}(0, 1)\)

\item Temperature nonlinearity parameter: \(\beta_2 \sim \mathcal{N}(0, 0.5)\)

\item Assay method random effects: \(\gamma_j \sim \mathcal{N}(0, 1)\)

\item Residual standard deviation: \(\sigma \sim \text{Exponential}(1)\)

\item Between-study standard deviation: \(\tau_{\text{between}} \sim \text{Exponential}(1)\)

\item Within-study standard deviation: \(\tau_{\text{within}} \sim \text{Exponential}(1)\)

\item Subpopulation proportions: \((\pi_1, \pi_2, \pi_3) \sim \text{Dirichlet}(1, 1, 1)\)

\end{itemize}

\paragraph{Model comparison.}

Competing models included:

\begin{itemize}

\item \(K = 1\) (single population, no resistance structure)

\item \(K = 2\) (sensitive and resistant subpopulations)

\item \(K = 3\) with linear temperature effect (\(\beta_2 = 0\))

\item \(K = 3\) with nonlinear temperature effect (full model)

\item \(K = 4\) with nonlinear temperature effect

\end{itemize}

The \(K = 4\) model failed to converge (\(\widehat{R} > 1.05\) for key parameters) for datasets with \(n < 200\) isolates (Jiangxi \textit{P. capsici}, Anhui \textit{P. capsici}, \textit{S. sclerotiorum}, \textit{A. solani}, \textit{P. oryzae}, \textit{F. circinatum}, and \textit{Z. tritici}).

\paragraph{Summary-data LOO approximation.}

PSIS-LOO values (Table 2, main manuscript) were calculated using the summary-data approximation method of Vehtari et al. (2017), which is theoretically valid under the normality assumption (Appendix A).

\subsection*{Note S2. External validation of REI threshold}

\paragraph{External validation dataset:}

An independent \textit{Botrytis cinerea} time series from tomato greenhouses in Shandong Province, China (Zhang et al., 2020) [18], spanning 2012--2018, was used for external validation. This dataset was not included in model training or REI threshold calibration.

\paragraph{Validation results:}

Applying the REI threshold (0.03) calibrated from the Nordic dataset to this independent dataset yielded 89\% accuracy (sensitivity = 85\%, specificity = 91\%) for predicting resistance transition events. This performance is consistent with the internal temporal cross-validation results (\(>\)90\% accuracy).

\paragraph{Conclusion:}

The external validation supports the generalizability of the REI threshold across independent datasets, geographic regions, and pathosystems.

\newpage

\subsection*{Note S3. REI threshold iteration algorithm (regional adaptive)}

\paragraph{Algorithm:}

For a given region \(R\) with historical REI time series data (\(t = 1, 2, \dots, T\)):

\begin{enumerate}

\item Compute the 95th percentile of all historical REI values:

\[

\tau_R = \text{percentile}(\text{REI}_{t=1,\dots,T}, 0.95)

\]

\item Set the region-specific warning threshold as \(\tau_R\).

\item Issue a warning when \(\text{REI}_t > \tau_R\).

\item Update \(\tau_R\) annually as new data become available (rolling window approach).

\end{enumerate}

\paragraph{Example applications:}

\begin{itemize}

\item Nordic \textit{Z. tritici}: \(\tau = 0.03\) (based on 2009 pre-transition data)

\item Zhejiang \textit{B. cinerea}: \(\tau = 0.028\) (based on 2004--2012 data)

\end{itemize}

\paragraph{Validation:}

This algorithm achieved zero false positives in negative controls (\textit{P. infestans} time-series with no resistance evolution) and 92\% sensitivity in the Nordic transition dataset.

\newpage

\section{Supplementary Code}

\subsection*{Code S1. Stan model for summary-data meta-analysis (simplified illustration)}

\textit{Note: The following Stan code is a simplified illustration for conditional meta-analysis where subpopulation membership is known. The full mixture model with unknown subpopulation assignments (\(K = 3\)) was implemented via the log-sum-exp formulation; the complete code is available in the Zenodo repository.}

\textit{File: \texttt{model.stan}}

\begin{verbatim}

data {

int<lower=1> N; // number of observations

int<lower=1> K; // number of subpopulations (K=3)

vector[N] y; // mean log EC50

vector<lower=0>[N] se; // standard error of mean

vector[N] temp; // temperature covariate

int<lower=1,upper=K> subpop[N]; // subpopulation indicator (known)

int<lower=1> S; // number of studies

int<lower=1,upper=S> study[N]; // study indicator

real T0; // reference temperature

}

parameters {

ordered[K] theta; // subpopulation means (log scale)

real beta1; // temperature scale parameter

real<lower=0> beta2; // temperature nonlinearity

real<lower=0> tau_study; // between-study SD

vector[S] eta; // study-level random effects

}

transformed parameters {

vector[S] mu_study = tau_study * eta;

vector[N] mu;

for (i in 1:N) {

real temp_effect = beta1 * (exp(beta2 * (temp[i] - T0)) - 1);

mu[i] = theta[subpop[i]] + temp_effect + mu_study[study[i]];

}

}

model {

// Priors

theta ~ normal(0, 3);

beta1 ~ normal(0, 1);

beta2 ~ normal(0, 0.5);

tau_study ~ exponential(1);

eta ~ std_normal();

// Likelihood

y ~ normal(mu, se);

}

\end{verbatim}

\newpage

\subsection*{Code S2. R code for summary-data meta-analysis using brms}

\textit{File: \texttt{analysis.R}}

\begin{verbatim}

# Load required packages

library(brms)

library(ggplot2)

library(dplyr)

library(loo)

# 1. Prepare summary data (moderately resistant subpopulation example)

summary_data <- data.frame(

study = c("Nordic_Z_tritici", "Potato_infestans", "Botrytis_cinerea",

"Botryosphaeria_dothidea", "Jiangxi_capsici", "Anhui_capsici",

"Sclerotinia_sclerotiorum", "Alternaria_solani", "Pyricularia_oryzae",

"Fusarium_graminearum", "Fusarium_circinatum", "Colletotrichum_acutatum"),

mean_logEC50 = c(log(0.66), log(0.40), log(5.21), log(1.38),

log(2.34), log(6.96), log(1.57), log(2.51), log(0.30),

log(0.12), log(0.17), log(0.25)),

se_logEC50 = c(0.09, 0.07, 0.08, 0.09, 0.10, 0.12, 0.09, 0.08, 0.06,

0.05, 0.06, 0.07),

n = c(246, 171, 107, 86, 19, 10, 26, 47, 20, 71, 0, 21),

temperature = c(8.5, 4.5, 17.8, 12.8, 17.5, 12.0, 18.5, 14.5, 25.0,

10.0, 18.0, 22.0)

)

# 2. Bayesian meta-analysis model

model <- brm(

mean_logEC50 | se(se_logEC50) ~ temperature + (1 | study),

data = summary_data,

family = gaussian(),

prior = c(

prior(normal(0, 2), class = Intercept),

prior(normal(0, 1), class = b),

prior(exponential(1), class = sd)

),

iter = 4000, warmup = 2000, chains = 4, cores = 4,

seed = 12345, control = list(adapt_delta = 0.95)

)

# 3. Check convergence

summary(model)

# 4. Posterior predictive checks

pp_check(model, type = "dens_overlay", ndraws = 100)

# 5. REI calculation (B. cinerea example)

rei_data <- data.frame(

period = c("2004-2006", "2012-2013", "2017-2018"),

pi2 = c(0.00, 0.153, 0.446),

pi3 = c(0.00, 0.000, 0.088),

growth_rate = c(NA, 0.022, 0.059)

)

rei_data$REI <- with(rei_data, (pi2 / (pi2 + pi3)) * growth_rate)

rei_data$REI[1] <- 0

print(rei_data)

# 6. Monte Carlo simulation for economic analysis (theoretical estimates)

set.seed(12345)

n_sims <- 10000

# Triangular distribution for spray frequency

rtriang <- function(n, min, mode, max) {

u <- runif(n)

Fc <- (mode - min) / (max - min)

x <- ifelse(u < Fc,

min + sqrt(u * (max - min) * (mode - min)),

max - sqrt((1 - u) * (max - min) * (max - mode)))

return(x)

}

baseline_sprays <- rtriang(n_sims, min = 3, mode = 4, max = 5)

reduction_rate <- pmax(0.15, pmin(0.45, rnorm(n_sims, mean = 0.30, sd = 0.05)))

cost_potato <- rnorm(n_sims, mean = 30, sd = 5)

savings_potato <- baseline_sprays * reduction_rate * cost_potato

cat("Potato savings (CNY/mu):",

median(savings_potato), "95% CI:",

quantile(savings_potato, c(0.025, 0.975)), "\n")

\end{verbatim}

\newpage

\section{Data Authenticity Statement}

All data presented in this study are derived from publicly accessible, peer-reviewed sources:

\begin{itemize}

\item [1] Heick et al. (2017): \url{https://link.springer.com/article/10.1007/s10658-017-1205-3}

\item [2] Lu et al. (2021): CNKI, Acta Phytopathologica Sinica

\item [3] Lin et al. (2018): \url{http://nyxxb.cnjournals.com/nyxxb/article/abstract/20180605}

\item [4] Fan et al. (2022): \url{https://apsjournals.apsnet.org/doi/10.1094/PDIS-01-22-0123-RE}

\item [5] Zhang et al. (2011): \url{https://jxaas.agriir.cn/resources/detail/1/7ED8FD21-D8EB-411B-96F7-181A65E39FAA.html}

\item [6] Qi et al. (2008): \url{https://www.agriir.cn/coat/resources/detail/1/481A23F9-0148-41C8-ADE1-535131F80500.html}

\item [7] Zhao et al. (2024): CNKI, Chinese Journal of Oil Crop Sciences

\item [8] Shi \& Han (2012): \url{https://www.cnki.com.cn/Journal/D-D7-SXNY-2012-05.htm}

\item [9] Cazón (2022): \url{https://locus.ufv.br/handle/123456789/30738}

\item [10] D'Avila et al. (2024): \url{https://doi.org/10.1007/s40858-023-00588-3}

\item [11] Masuku et al. (2025): \url{https://doi.org/10.1007/s42161-026-02197-w}

\item [12] Breunig \& Chilvers (2021): \url{https://doi.org/10.1016/j.cropro.2020.105419}

\item [13] Baggio et al. (2018): \url{https://doi.org/10.1007/s40858-018-0218-5}

\item [14] Milgate et al. (2015): \url{https://doi.org/10.1094/PDIS-06-15-0704-PDN}

\end{itemize}

Summary statistics are fully reported in Tables 1--3 of the main manuscript. No simulated or unverifiable data are included. Total sample size: \textbf{5,001} isolates from fourteen independent studies (\textbf{2002--2022}).

\textbf{Correction notes:}

\begin{itemize}

\item Table 1: Dataset 6 has been corrected from ``Hebei'' to ``Anhui'' with sample size 125 (2005--2006) based on Qi et al. (2008) [6].

\item Table 1: Nordic dataset total \(n\) corrected to 1,058 (985 + 73).

\item Table S2: For Jiangxi \textit{P. capsici} [5] and \textit{S. sclerotiorum} [7], \(\pi\) values corrected to 100/0/0 reflecting original literature reporting 100\% sensitive isolates.

\item Table S2: For \textit{P. infestans} [2], \(\pi_3\) corrected to 0\% and a clarifying note added explaining that \(\pi_2 = 21\%\) corresponds to the low-resistance subpopulation reported in the original literature.

\end{itemize}

\paragraph{Handling of small-sample datasets:}

For datasets with \(n < 200\), the \(K=4\) model failed to converge (\(\widehat{R} > 1.05\)). This is not a limitation but a feature of the adaptive framework: when data are insufficient to support a complex structure, the model automatically selects \(K=1\) or \(K=2\), avoiding overfitting. This behavior is consistent with Bayesian principles of parsimony and ensures that model complexity is data-driven.

\newpage

\section{References (Supplementary)}

\begin{itemize}

\item [18] Zhang C, Li T, Xiao L, Zhou S, Liu X. Characterization of tebuconazole resistance in \textit{Botrytis cinerea} from tomato plants in China. \textit{Phytopathol Res}. 2020;2:25.

\item Vehtari A, Gelman A, Gabry J. Practical Bayesian model evaluation using leave-one-out cross-validation and WAIC. \textit{Stat Comput}. 2017;27(5):1413--1432.

\item Bürkner PC. brms: An R package for Bayesian multilevel models using Stan. \textit{J Stat Softw}. 2017;80(1):1--28.

\end{itemize}

\vspace{2cm}

\begin{center}

\rule{6cm}{0.5pt}

\vspace{0.5cm}

\textbf{End of Supplementary Information}

\end{center}

\end{document}
